# Supplementary material
Source: publisher figshare collection journal article supplement (https://acs.figshare.com/ndownloader/files/25633428)
Supplement: Supplementary file 1 [file 25633428]

Compound	Smiles	MALT1 biochemical IC50 (uM)	MALT1 cellular Bcl10 cleavage IC50 (uM)	Solubility pH 6.8 (mM)
1	COc1ccc(cc1Cl)NC(=O)NC3COc2ccccc2C3	0.245	-	-
2	COc1ccc(cc1Cl)NC(=O)N[C@H]3COc2ccccc2C3	0.135	2.3	-
3	COc1ccc(cc1Cl)NC(=O)N[C@@H]3COc2ccccc2C3	>100	-	-
4	COc1ccc(cc1Cl)NC(=O)NC3COc2ccc(Br)cc2C3	0.050	-	-
5	COc1ccc(cc1Cl)NC(=O)NC3COc2ccc(C#N)cc2C3	0.15	1.92	-
6	COc1ccc(cc1Cl)NC(=O)NC3COc2ccc(F)cc2C3	0.057	1.25	-
7	COc1ccc(cc1Cl)NC(=O)NC3CCc2ccccc2C3	>100	-	-
8	COc1ccc(cc1Cl)NC(=O)NC3CSc2ccc(F)cc2C3	0.145	4.27	-
9	COc1ccc(cc1Cl)NC(=O)CC3COc2ccccc2C3	1	-	-
10	COc3ccc(CC(=O)NC2COc1ccccc1C2)cc3Cl	>100	-	-
11	COc1ccc(cc1Cl)N(C)C(=O)NC3COc2ccc(Br)cc2C3	>100	-	-
12	COc1ccc(cc1Cl)NC(=O)N(C)C3COc2ccc(Br)cc2C3	>100	-	-
13	O=C(Nc1ccc(c(Cl)c1)N2C=NC=N2)NC4COc3ccc(Br)cc3C4	0.026	1.96	-
14	COc1ncc(cc1Cl)NC(=O)NC3COc2ccc(Br)cc2C3	0.031	3.54	-
15	COc1ccc(cc1Cl)NC(=O)Nc3cnc2ccc(Br)cc2c3	0.242	4.82	<0.004
16	COc1ccc(cc1Cl)NC(=O)Nc3cnc2ccc(Br)cc2c3Cl	0.029	0.51	<0.004
17	COc1ccc(cc1Cl)NC(=O)Nc3cnc2ccc(C#N)cc2c3N(C)C4CCOCC4	0.008	0.67	0.027
18	COc1ncc(cc1Cl)NC(=O)Nc3cnc2ccc(C#N)cc2c3N(C)C4CCOCC4	0.002	0.19	<0.004
19	COc1ccc(cc1Cl)NC(=O)Nc3cnc2ccc(C#N)cc2c3N4CCOC[C@@H]4C	0.006	0.12	<0.004
MLT-827	COc1ncc(cc1Cl)NC(=O)Nc3cnc2ccc(C#N)cc2c3N4CCOC[C@@H]4C	0.005	0.037	<0.004
21	COc1ncc(cc1Cl)NC(=O)Nc3cnc2ccc(F)cc2c3N(C)C4CCCN(C)C4	0.070	-	0.061
22	C[C@H]1COCCN1c3c2cc(F)ccc2ncc3NC(=O)Nc5cnc(OC4CCN(C)CC4)c(Cl)c5	0.070	-	0.06
23	COc1ncc(cc1Cl)NC(=O)NC3C=NC2=CC(Br)=NN2C=3N4CCOC[C@@H]4C	0.017	0.74	0.155
24	COc1ncc(cc1Cl)NC(=O)NC3C=NC2=CC(Cl)=NN2C=3N4CCOCC4(C)C	0.002	0.08	<0.004
25	CC1(C)COCCN1C2=C(C=NC3=CC(Cl)=NN23)NC(=O)Nc4ccnc(c4)C(F)(F)F	0.006	0.28	0.008
26	COc1ncc(cc1Cl)NC(=O)NC3C=NC2=CC(Cl)=NN2C=3N4[C@@H](C)COC[C@@H]4C	0.006	0.33	0.081
MLT-231	C[C@H]1COC[C@H](C)N1C2=C(C=NC3=CC(Cl)=NN23)NC(=O)Nc4ccnc(c4)C(F)(F)F	0.009	0.16	0.266
TC1	CC1C=NN(C=1)c2ccc(cc2Cl)NC(=O)NC4COc3ccc(Br)cc3C4	0.029	0.950	0.013
TC2	COC[C@H]1COCCN1C2=C(C=NC3=CC(C)=NN23)NC(=O)Nc4ccc(OC)c(Cl)c4	0.168		0.740
